# Supplementary material for: Chapparvovirus DNA Found in 4% of Dogs with Diarrhea
Source: PubMed Central journal article supplement (PMC6563200; doi:10.3390/v11050398), 2019-04-27
Supplement: viruses-11-00398-s001.pdf [file viruses-11-00398-s001.pdf]

|                               |          |          |          |          |          |          |          |          |          |          |          |          |          |          |          |          |          |          |          |          |          |  |  |  |  |  |  |  |  |  |  |  |  |  |
|-------------------------------|----------|----------|----------|----------|----------|----------|----------|----------|----------|----------|----------|----------|----------|----------|----------|----------|----------|----------|----------|----------|----------|--|--|--|--|--|--|--|--|--|--|--|--|--|
| MH893826<br>cachavirus 1A     |          |          |          |          |          |          |          |          |          |          |          |          |          |          |          |          |          |          |          |          |          |  |  |  |  |  |  |  |  |  |  |  |  |  |
| MK448316<br>cachavirus 1B     | 100      |          |          |          |          |          |          |          |          |          |          |          |          |          |          |          |          |          |          |          |          |  |  |  |  |  |  |  |  |  |  |  |  |  |
| NC032097<br>Desmodus rotundus | 47       | 46       |          |          |          |          |          |          |          |          |          |          |          |          |          |          |          |          |          |          |          |  |  |  |  |  |  |  |  |  |  |  |  |  |
| MG693107 bat                  | 61       | 61       | 44       |          |          |          |          |          |          |          |          |          |          |          |          |          |          |          |          |          |          |  |  |  |  |  |  |  |  |  |  |  |  |  |
| KT961660 simian               | 33       | 30       | 33       | 29       |          |          |          |          |          |          |          |          |          |          |          |          |          |          |          |          |          |  |  |  |  |  |  |  |  |  |  |  |  |  |
| KX272741 rat                  | 44       | 44       | 43       | 42       | 32       |          |          |          |          |          |          |          |          |          |          |          |          |          |          |          |          |  |  |  |  |  |  |  |  |  |  |  |  |  |
| JX885610 Eidolon<br>helvum    | 55       | 53       | 69       | 56       | 37       | 50       |          |          |          |          |          |          |          |          |          |          |          |          |          |          |          |  |  |  |  |  |  |  |  |  |  |  |  |  |
| KF925531 turkey               | 37       | 35       | 31       | 32       | 29       | 35       | 39       |          |          |          |          |          |          |          |          |          |          |          |          |          |          |  |  |  |  |  |  |  |  |  |  |  |  |  |
| KU563733 porcine              | 35       | 34       | 34       | 36       | 44       | 34       | 42       | 32       |          |          |          |          |          |          |          |          |          |          |          |          |          |  |  |  |  |  |  |  |  |  |  |  |  |  |
| MF175078 murine               | 45       | 44       | 58       | 42       | 34       | 45       | 68       | 33       | 37       |          |          |          |          |          |          |          |          |          |          |          |          |  |  |  |  |  |  |  |  |  |  |  |  |  |
| MG846441 chicken              | 34       | 33       | 31       | 32       | 28       | 33       | 37       | 35       | 31       | 34       |          |          |          |          |          |          |          |          |          |          |          |  |  |  |  |  |  |  |  |  |  |  |  |  |
| MH670587 mouse<br>kidney      | 45       | 44       | 59       | 42       | 34       | 45       | 68       | 33       | 37       | 98       | 35       |          |          |          |          |          |          |          |          |          |          |  |  |  |  |  |  |  |  |  |  |  |  |  |
| MK513528<br>Tasmanian devil   | 30       | 30       | 31       | 30       | 25       | 29       | 35       | 29       | 27       | 30       | 26       | 30       |          |          |          |          |          |          |          |          |          |  |  |  |  |  |  |  |  |  |  |  |  |  |
| MK513529<br>Tasmanian devil   | 49       | 48       | 60       | 45       | 34       | 46       | 69       | 33       | 36       | 73       | 34       | 74       | 30       |          |          |          |          |          |          |          |          |  |  |  |  |  |  |  |  |  |  |  |  |  |
| MK513530<br>Tasmanian devil   | 25       | 25       | 25       | 26       | 17       | 26       | 44       | 22       | 21       | 27       | 21       | 27       | 35       | 28       |          |          |          |          |          |          |          |  |  |  |  |  |  |  |  |  |  |  |  |  |
| MK513531<br>Tasmanian devil   | 34       | 33       | 31       | 32       | 29       | 34       | 38       | 38       | 29       | 32       | 36       | 32       | 28       | 34       | 22       |          |          |          |          |          |          |  |  |  |  |  |  |  |  |  |  |  |  |  |
| MK513532<br>Tasmanian devil   | 34       | 32       | 31       | 31       | 27       | 33       | 38       | 40       | 29       | 32       | 33       | 32       | 28       | 32       | 22       | 56       |          |          |          |          |          |  |  |  |  |  |  |  |  |  |  |  |  |  |
| MK513533<br>Tasmanian devil   | 36       | 34       | 31       | 31       | 25       | 32       | 39       | 38       | 28       | 32       | 35       | 32       | 28       | 34       | 25       | 61       | 57       |          |          |          |          |  |  |  |  |  |  |  |  |  |  |  |  |  |
| KY312548 Red crane            | 36       | 35       | 32       | 33       | 24       | 33       | 40       | 43       | 28       | 32       | 33       | 32       | 28       | 32       | 23       | 41       | 41       | 38       |          |          |          |  |  |  |  |  |  |  |  |  |  |  |  |  |
| KY312549 Red crane            | 36       | 34       | 32       | 32       | 25       | 34       | 40       | 45       | 29       | 33       | 33       | 33       | 26       | 35       | 22       | 38       | 39       | 39       | 44       |          |          |  |  |  |  |  |  |  |  |  |  |  |  |  |
| KY312550 Red crane            | 34       | 33       | 31       | 32       | 26       | 32       | 39       | 42       | 31       | 33       | 34       | 33       | 27       | 33       | 21       | 38       | 40       | 38       | 41       | 40       |          |  |  |  |  |  |  |  |  |  |  |  |  |  |
| KY312551<br>Red crane         | 38       | 36       | 34       | 35       | 26       | 32       | 38       | 41       | 30       | 33       | 33       | 33       | 29       | 35       | 21       | 36       | 38       | 37       | 40       | 41       | 42       |  |  |  |  |  |  |  |  |  |  |  |  |  |
|                               | MH893826 | MK448316 | NC032097 | MG693107 | KT961660 | KX272741 | JX885610 | KF925531 | KU563733 | MF175078 | MG846441 | MH670587 | MK513528 | MK513529 | MK513530 | MK513531 | MK513532 | MK513533 | KY312548 | KY312549 | KY312550 |  |  |  |  |  |  |  |  |  |  |  |  |  |

S1. Supplementary Table 1. Percent identity between NS1 proteins of chapparriviruses. Percent identities were calculated in Geneious 11.1.4 based on a MUSCLE alignment.
